# Supplementary material for: Simulation of hearing loss can induce pitch shifts for complex tones
Source: PeerJ. 2023 Sep 15;11:e16053. doi: 10.7717/peerj.16053 (PMC10506576; doi:10.7717/peerj.16053)
Supplement: Table S1 [file peerj-11-16053-s001.xlsx]

## Sheet: Experiment 1
Tasks				Results
	A button	B button		Participant	Age	Sex	Q1	Q2	Q3	Q4	Q5	Q6	Q7	Q8	Q9	Q10	Q11	Q12	Q13	Q14	Q15	Q16
Q1	X2 (Tone B)	X2 (Tone A)		1	59	M	A	B	B	B	A	A	B	A	A	B	B	A	B	A	B	A
Q2	X1 (Tone A)	X1 (Tone B)		2	58	M	B	A	A	A	B	B	A	A	B	A	B	B	A	B	A	A
Q3	Y2 (Tone A)	Y2 (Tone B)		3	51	M	A	B	A	B	B	B	B	A	B	A	B	B	A	B	B	B
Q4	Y3 (Tone A)	Y3 (Tone B)		4	45	M	A	B	B	B	A	A	B	A	A	B	B	A	B	A	B	B
Q5	Y3 (Tone B)	Y3 (Tone A)		5	26	M	A	B	A	B	B	A	B	B	A	B	A	A	B	B	B	B
Q6	Y1 (Tone B)	Y1 (Tone A)		6	38	M	A	B	A	A	B	A	B	A	A	B	A	A	B	A	B	A
Q7	X4 (Tone A)	X4 (Tone B)		7	50	M	A	B	B	A	B	A	A	A	A	B	B	A	B	B	B	B
Q8	Y4 (Tone A)	Y4 (Tone B)		8	48	M	A	B	B	A	A	A	A	A	A	B	B	A	B	A	B	B
Q9	Y2 (Tone B)	Y2 (Tone A)		9	47	M	A	B	B	A	B	A	B	A	A	B	B	A	B	B	B	B
Q10	X2 (Tone A)	X2 (Tone B)		10	33	M	A	B	B	B	A	A	B	A	A	B	B	A	B	A	B	A
Q11	X3 (Tone A)	X3 (Tone B)		11	43	M	B	B	A	A	B	B	B	A	B	A	B	B	A	B	B	B
Q12	X1 (Tone B)	X1 (Tone A)		12	52	M	B	B	A	B	B	B	A	A	B	A	A	B	B	B	B	B
Q13	Y1 (Tone A)	Y1 (Tone B)		13	27	M	B	A	A	B	B	B	B	A	B	A	A	B	A	B	B	B
Q14	X3 (Tone B)	X3 (Tone A)		14	50	M	A	B	A	A	B	A	B	A	B	B	B	A	B	B	B	B
Q15	Y4 (Tone B)	Y4 (Tone A)		15	32	M	A	B	A	A	B	B	B	A	B	A	A	B	A	A	B	A
Q16	X4 (Tone B)	X4 (Tone A)		16	24	M	A	B	B	A	B	A	A	A	A	A	B	A	A	B	B	B
				17	26	M	A	B	B	B	A	A	B	A	A	B	B	A	B	A	B	A
				18	36	F	A	B	B	B	A	A	B	A	A	B	B	A	B	A	B	A
				19	44	F	A	B	B	B	A	A	B	A	A	B	B	A	B	A	B	A
				20	23	F	A	B	A	A	B	A	A	A	B	A	A	B	A	B	B	B
				21	51	F	A	A	A	A	A	A	A	A	A	B	B	A	A	B	B	B
				22	52	F	B	B	A	A	B	A	B	A	B	A	B	A	A	A	B	B
				23	60	F	A	A	A	A	B	A	A	A	B	A	A	A	A	B	B	B
				24	26	M	A	B	B	B	A	A	B	A	A	B	A	A	A	A	B	B
				25	33	F	A	B	B	B	B	B	B	B	A	B	B	A	A	B	B	B
				26	32	M	A	B	B	B	A	A	A	B	B	B	B	A	A	B	B	A
				27	58	M	A	B	B	A	B	A	A	A	A	B	A	A	B	A	B	B
				28	52	M	B	A	A	A	B	B	B	B	B	A	A	A	A	B	B	A
				29	59	M	A	B	B	B	A	A	B	A	A	B	B	A	B	A	B	B
				30	49	M	B	A	A	A	B	B	A	A	B	A	B	B	A	B	A	B
				31	54	M	B	A	A	A	B	A	A	A	B	A	A	A	A	B	B	B
				32	32	M	B	B	B	B	A	A	B	A	A	B	B	A	B	A	B	A
				33	21	F	A	B	B	B	B	A	B	A	B	A	B	A	B	A	B	B
				34	42	F	A	B	B	B	B	A	B	B	B	A	B	A	B	B	B	B
				35	24	F	B	A	A	A	B	B	B	A	B	A	A	B	A	B	B	B
				36	25	F	B	A	A	A	B	B	A	A	B	B	A	B	A	B	B	B
				37	24	F	A	B	B	B	A	A	B	A	A	B	B	A	B	A	B	A
				38	19	F	A	B	B	B	A	A	B	A	A	B	B	A	B	A	B	A
				39	23	F	A	B	B	B	B	A	B	A	A	B	B	A	B	A	B	A
	To avoid misunderstanding, "A button" and "B button" are the buttons on the computer monitor. They are different from "Tone A" and "Tone B” in the manuscript.
