# Supplementary material for: Simulation of hearing loss can induce pitch shifts for complex tones
Source: PeerJ. 2023 Sep 15;11:e16053. doi: 10.7717/peerj.16053 (PMC10506576; doi:10.7717/peerj.16053)
Supplement: Table S2 [file peerj-11-16053-s002.xlsx]

## Sheet: Experiment 1
Results
			(Y4)	(X3)	(Y2)	(Y3)	(X1)	(Y2)	(Y4)	(Y1)	(X2)	(Y1)	(X4)	(X1)	(X2)	(X3)	(Y3)	(X4)
Participant	Age	Sex	Q1	Q2	Q3	Q4	Q5	Q6	Q7	Q8	Q9	Q10	Q11	Q12	Q13	Q14	Q15	Q16
1	38	M	X	O	O	O	O	O	X	O	O	O	O	O	O	O	O	O
2	59	M	X	O	O	X	O	O	X	O	O	O	O	O	O	O	X	O
3	58	M	X	O	X	X	O	O	X	O	O	O	O	O	O	O	X	O
4	32	M	X	O	O	X	O	O	X	O	O	O	X	O	O	O	X	O
5	51	M	X	O	O	X	O	O	X	O	O	O	O	O	O	O	X	O
6	51	M	X	O	O	X	O	O	X	O	O	O	O	O	O	O	X	O
7	51	M	X	O	O	X	O	O	X	O	O	O	X	O	O	O	X	O
8	49	M	X	O	O	X	O	O	X	O	O	O	O	O	O	O	X	O
9	24	M	X	O	O	X	O	O	X	O	O	O	X	O	O	X	X	X
10	50	M	X	O	O	O	O	O	X	O	O	O	O	O	O	O	O	O
11	33	M	X	O	O	X	O	O	X	O	O	O	O	O	O	O	X	O
12	39	M	X	O	O	X	O	O	X	O	O	O	O	X	X	X	X	X
13	26	M	X	O	O	O	O	O	X	O	O	O	O	O	O	O	O	O
14	43	M	X	O	O	X	O	O	X	O	O	O	X	O	O	O	X	O
15	32	M	X	O	O	X	O	O	X	O	O	O	X	O	O	O	X	O
16	26	M	X	O	O	X	O	O	X	O	O	O	O	O	O	O	X	O
17	47	M	X	O	O	X	O	O	X	O	O	O	O	O	O	O	X	O
18	50	M	X	O	O	O	O	O	X	O	O	O	X	O	O	O	X	X
19	33	F	X	O	O	X	O	O	X	O	O	O	X	O	O	O	X	X
20	43	F	X	O	O	X	O	O	X	O	O	O	O	O	O	O	X	O
21	33	F	X	O	X	X	O	X	X	O	O	O	O	O	O	O	X	O
22	26	M	X	O	O	X	O	O	X	O	O	O	O	O	O	O	X	O
23	46	M	X	O	X	X	O	O	X	O	O	O	O	O	O	O	X	O
24	60	M	X	O	X	X	O	O	X	O	O	O	X	X	O	O	X	O
25	27	M	X	O	O	X	X	X	X	O	O	O	O	O	O	O	O	X
26	58	M	X	O	X	X	O	O	X	O	O	O	O	O	O	O	X	O
27	54	M	X	O	X	X	O	X	X	O	O	O	O	O	O	O	X	X
28	42	F	X	O	O	X	O	O	X	O	O	O	O	O	O	O	X	O
29	24	F	X	O	X	X	O	X	X	X	O	O	X	O	O	O	X	X
30	21	F	X	O	O	X	O	O	X	O	O	O	X	O	O	O	X	O
31	52	F	X	O	O	O	O	O	X	O	O	O	O	O	O	O	O	O
32	51	F	X	X	O	X	O	O	X	O	O	O	O	O	O	O	X	O
33	24	F	X	O	O	X	O	O	X	O	O	O	O	O	O	O	X	O
34	44	F	X	O	O	O	O	O	X	O	O	O	O	O	O	O	O	O
35	36	F	X	O	O	X	O	O	X	O	O	O	O	O	X	O	X	O
36	61	F	X	O	O	X	O	O	X	O	X	X	X	O	O	O	X	O
37	24	F	X	O	O	X	O	O	X	O	O	O	O	O	O	O	X	O
38	19	F	X	O	O	X	O	O	X	O	O	O	O	O	O	O	X	O
	O: correct melody, X: off-key
